# Supplementary material
Source: PubMed Central journal article supplement (PMC5562963)

**Figure e-1. Findings of autopsy.** Macroscopic (A) and microscopic findings (B-L) of brain autopsy of patient B-1 with indication of applied staining.

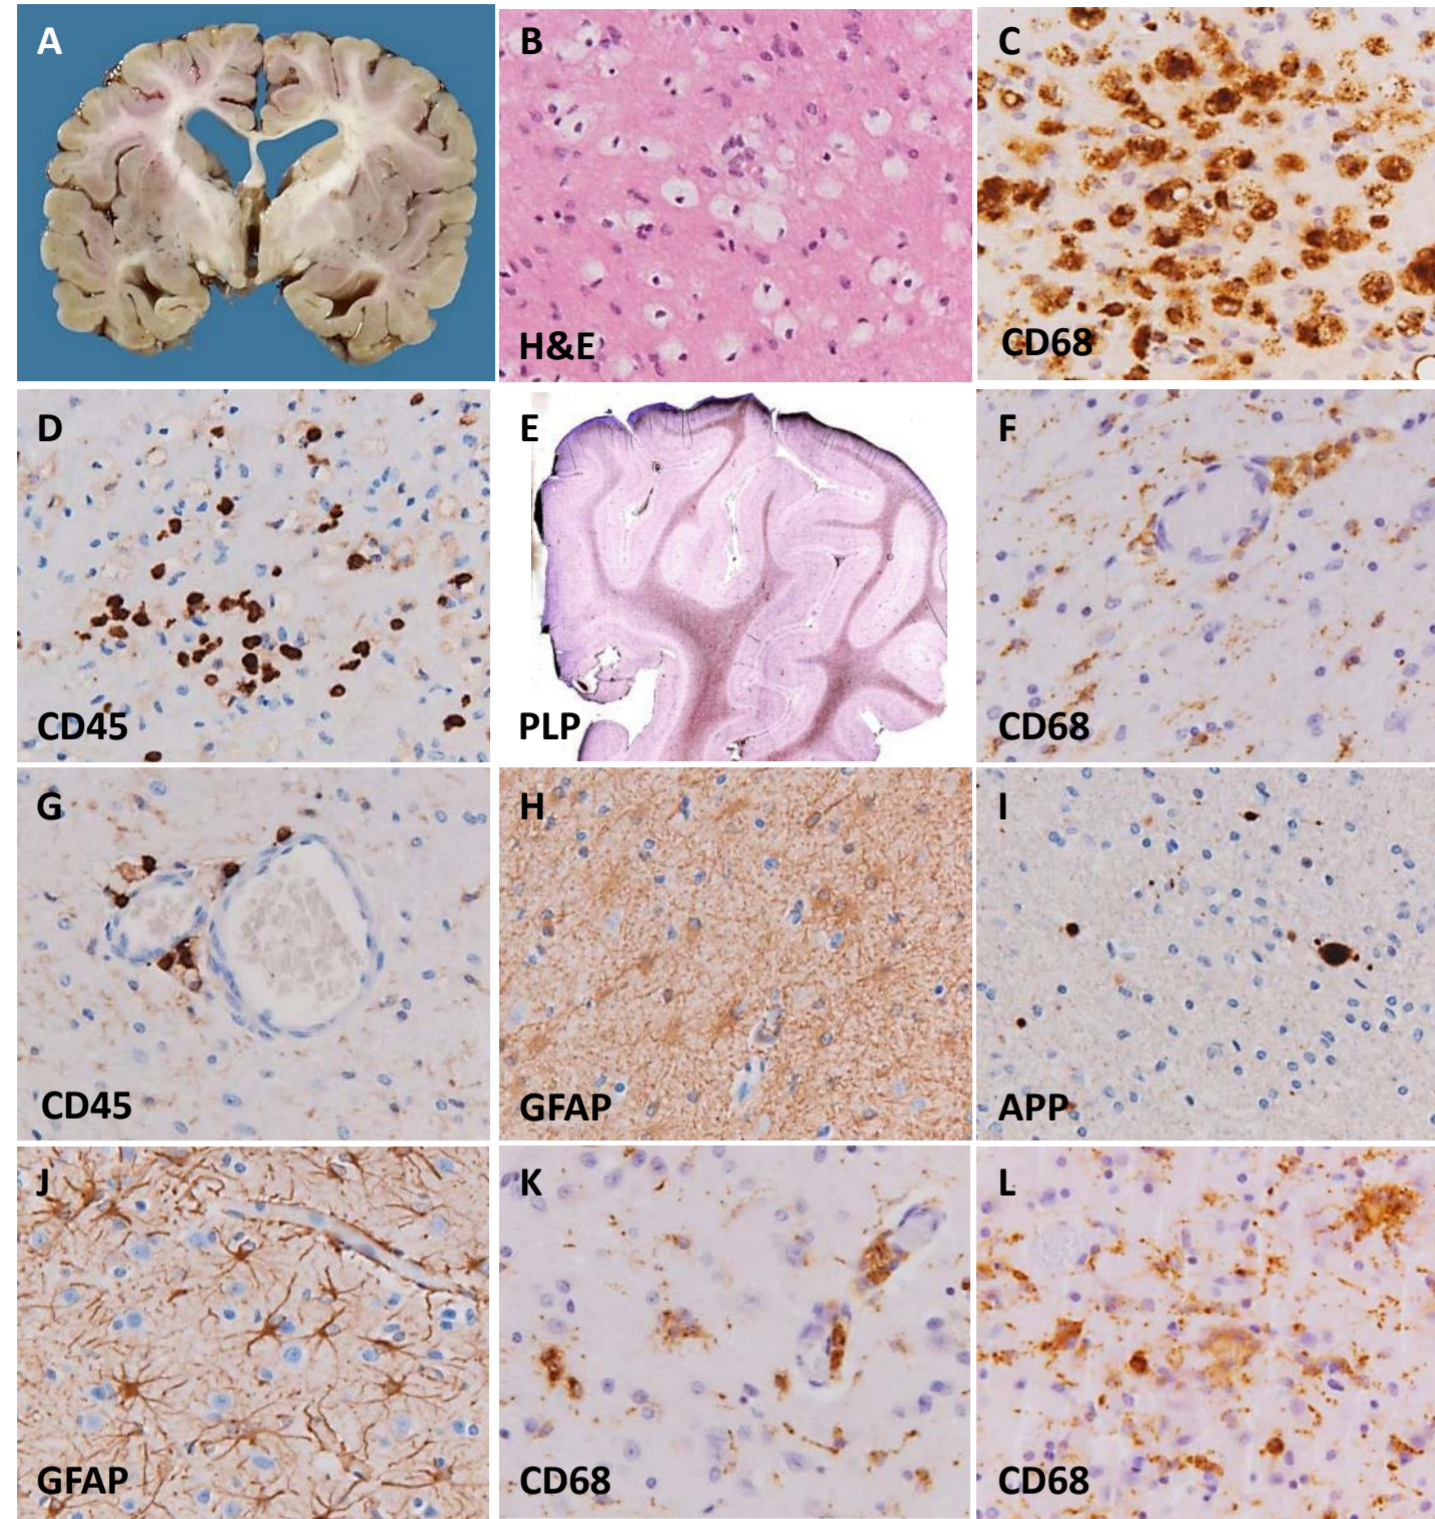

Supplement: supp_WNL.0000000000004234_figure_e-1.pdf [file supp_WNL.0000000000004234_figure_e-1.pdf]
